# Supplementary material for: Household Income Relationship With Health Services Utilization and Healthcare Expenditures in People Aged 75 Years or Older in Japan: A Population-Based Study Using Medical and Long-term Care Insurance Claims Data
Source: PubMed Central journal article supplement (PMC6737189; doi:10.2188/jea.je20180055), 2019-10-05
Supplement: je-29-377-s001.pdf [file je-29-377-s001.pdf]

**eFigure 1.** Flow diagram of study participants

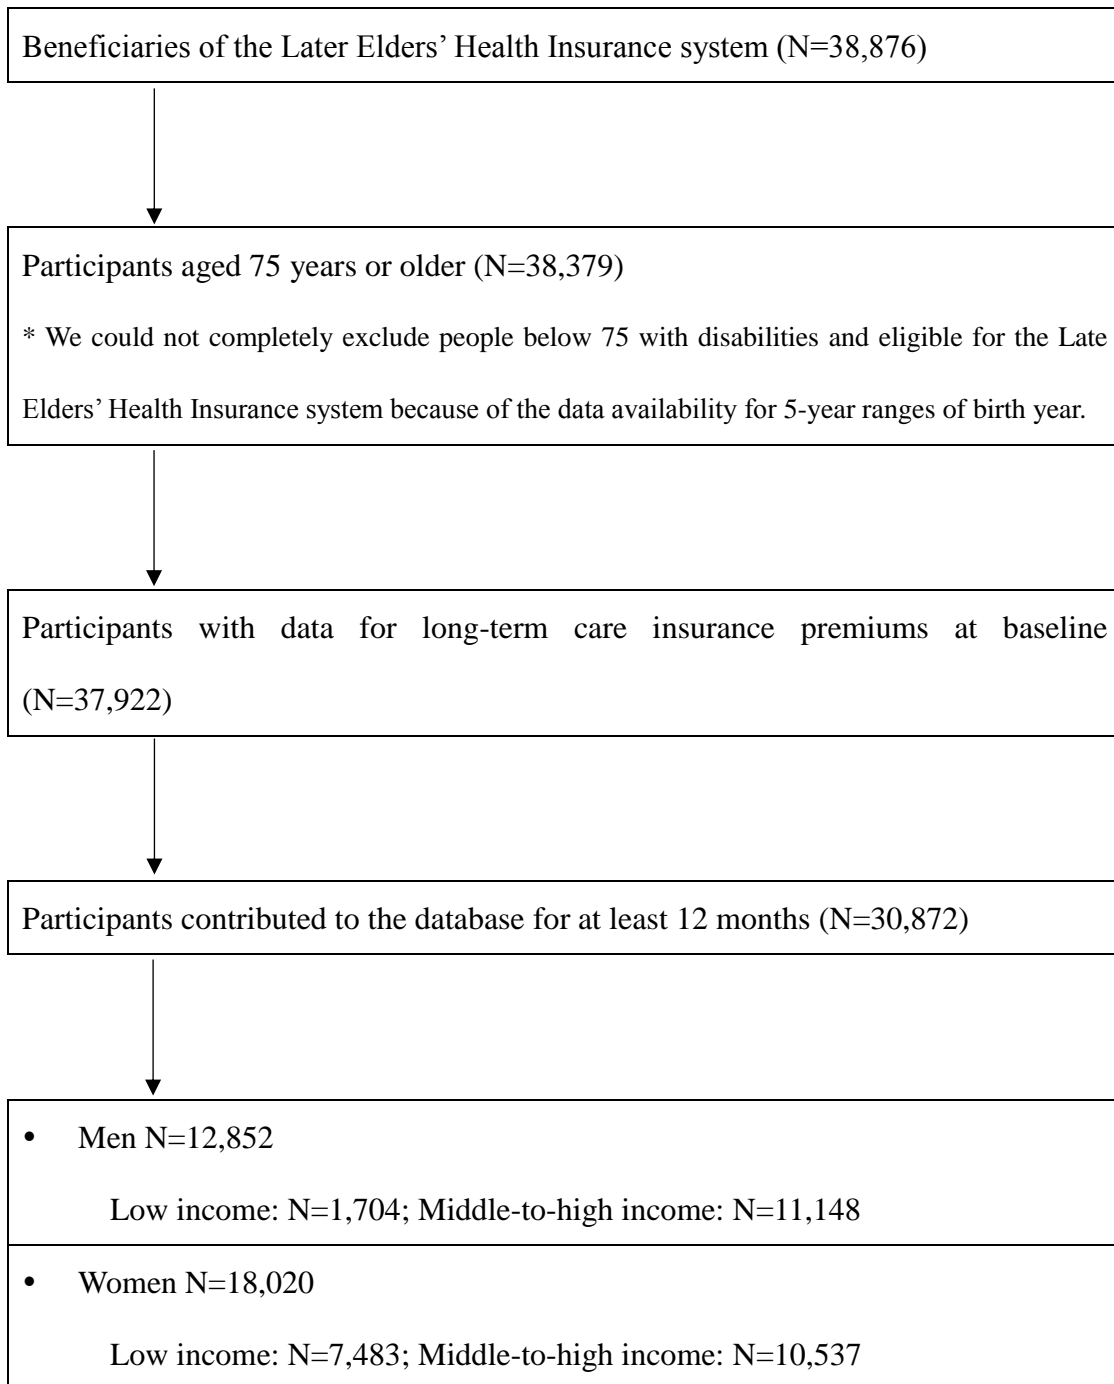

**eTable 1.** Baseline characteristics of study population with inpatient services use

|                  |                    | Men                   |                                    | Women                   |                                    |
|------------------|--------------------|-----------------------|------------------------------------|-------------------------|------------------------------------|
|                  |                    | Low income<br>(N=328) | Middle-to-high income<br>(N=1,963) | Low income<br>(N=1,311) | Middle-to-high income<br>(N=1,517) |
| Age group, years | 72–76 <sup>a</sup> | 94 (28.7)             | 535 (27.3)                         | 183 (14.0)              | 336 (22.2)                         |
|                  | 77–81              | 132 (40.2)            | 754 (38.4)                         | 370 (28.2)              | 499 (32.9)                         |
|                  | 82–86              | 72 (22.0)             | 442 (22.5)                         | 347 (26.5)              | 380 (25.1)                         |
|                  | ≥87                | 30 (9.2)              | 232 (11.8)                         | 411 (31.4)              | 302 (19.9)                         |
| LTC needs level  | Independent        | 181 (55.2)            | 1,352 (68.9)                       | 514 (39.2)              | 876 (57.8)                         |
|                  | Support 1 & 2      | 26 (7.9)              | 117 (6.0)                          | 128 (9.8)               | 114 (7.5)                          |
|                  | Care 1 & 2         | 48 (14.6)             | 234 (11.9)                         | 296 (22.6)              | 258 (17.0)                         |
|                  | Care 3             | 33 (10.1)             | 108 (5.5)                          | 116 (8.9)               | 96 (6.3)                           |
|                  | Care 4             | 22 (6.7)              | 85 (4.3)                           | 109 (8.3)               | 72 (4.8)                           |
|                  | Care 5             | 18 (5.5)              | 67 (3.4)                           | 148 (11.3)              | 101 (6.7)                          |

LTC, long-term care. Figures are shown as frequencies (%).

Participants who had at least one claim submitted for inpatient services, *excluding* some surgical procedures with episode-based bundled payment, during the 12-month study period.

Some categories were combined because of the small numbers of participants in some cases.

<sup>a</sup> People <75 were only included if eligible for the Late Elders' Health Insurance system.

**eTable 2.** Baseline characteristics of study population with institutional care services use

|                  |                                          | Men                   |                                  | Women                   |                                  |
|------------------|------------------------------------------|-----------------------|----------------------------------|-------------------------|----------------------------------|
|                  |                                          | Low income<br>(N=124) | Middle-to-high income<br>(N=420) | Low income<br>(N=1,194) | Middle-to-high income<br>(N=655) |
| Age group, years | 72–76 <sup>a</sup>                       | 31 (25.0)             | 48 (11.4)                        | 74 (6.2)                | 60 (9.2)                         |
|                  | 77–81                                    | 35 (28.2)             | 104 (24.8)                       | 178 (14.9)              | 126 (19.2)                       |
|                  | 82–86                                    | 34 (27.4)             | 136 (32.4)                       | 318 (26.6)              | 193 (29.5)                       |
|                  | ≥87                                      | 24 (19.4)             | 132 (31.4)                       | 624 (52.3)              | 276 (42.1)                       |
| LTC needs level  | Independent & Support 1 & 2 <sup>b</sup> | 11 (8.9)              | 61 (14.5)                        | 98 (8.2)                | 74 (11.3)                        |
|                  | Care 1 & 2                               | 30 (24.2)             | 128 (30.5)                       | 360 (30.2)              | 205 (31.3)                       |
|                  | Care 3                                   | 37 (29.8)             | 107 (25.5)                       | 269 (22.5)              | 165 (25.2)                       |
|                  | Care 4                                   | 33 (26.6)             | 78 (18.6)                        | 233 (19.5)              | 105 (16.0)                       |
|                  | Care 5                                   | 13 (10.5)             | 46 (11.0)                        | 234 (19.6)              | 106 (16.2)                       |

LTC, long-term care. Figures are shown as frequencies (%).

Some categories were combined because of the small numbers of participants in some cases.

<sup>a</sup> People <75 years were only included if they were eligible for the Late Elders' Health Insurance system.

<sup>b</sup> This category includes people who were eligible for institutional care during the 12-month study period.

**eTable 3.** Baseline characteristics of study population with home care services use

|                  |                          | Men                   |                                    | Women                   |                                    |
|------------------|--------------------------|-----------------------|------------------------------------|-------------------------|------------------------------------|
|                  |                          | Low income<br>(N=352) | Middle-to-high income<br>(N=1,700) | Low income<br>(N=2,245) | Middle-to-high income<br>(N=2,375) |
| Age group, years | 72–76 <sup>a</sup>       | 103 (29.3)            | 284 (16.7)                         | 214 (9.5)               | 296 (12.5)                         |
|                  | 77–81                    | 118 (33.5)            | 503 (29.6)                         | 539 (24.0)              | 623 (26.2)                         |
|                  | 82–86                    | 77 (21.9)             | 508 (29.9)                         | 696 (31.0)              | 718 (30.2)                         |
|                  | 87–91                    | 43 (12.2)             | 316 (18.6)                         | 556 (24.8)              | 506 (21.3)                         |
|                  | ≥92                      | 11 (3.1)              | 89 (5.2)                           | 240 (10.7)              | 232 (9.8)                          |
| LTC needs level  | Independent <sup>b</sup> | 52 (14.8)             | 309 (18.2)                         | 260 (11.6)              | 346 (14.6)                         |
|                  | Support 1                | 27 (7.7)              | 177 (10.4)                         | 276 (12.3)              | 254 (10.7)                         |
|                  | Support 2                | 31 (8.8)              | 168 (9.9)                          | 307 (13.7)              | 254 (10.7)                         |
|                  | Care 1                   | 66 (18.8)             | 328 (19.3)                         | 491 (21.9)              | 531 (22.4)                         |
|                  | Care 2                   | 88 (25.0)             | 350 (20.6)                         | 419 (18.7)              | 468 (19.7)                         |
|                  | Care 3                   | 42 (11.9)             | 213 (12.5)                         | 241 (10.7)              | 276 (11.6)                         |
|                  | Care 4                   | 27 (7.7)              | 119 (7.0)                          | 142 (6.3)               | 150 (6.3)                          |
|                  | Care 5                   | 19 (5.4)              | 36 (2.1)                           | 109 (4.9)               | 96 (4.0)                           |

LTC, long-term care. Figures are shown as frequencies (%).

<sup>a</sup> People <75 years were only included if they were eligible for the Late Elders' Health Insurance system.

<sup>b</sup> This category includes people who were eligible for home care during the 12-month study period.

**eTable 4.** Annual medical services utilization by gender, household income category, and long-term care needs certification

| Indicators                                                        |              | Men          |                       | Women        |                       |
|-------------------------------------------------------------------|--------------|--------------|-----------------------|--------------|-----------------------|
|                                                                   |              | Low income   | Middle-to-high income | Low income   | Middle-to-high income |
| <b>Participants without LTC needs certification</b>               |              |              |                       |              |                       |
| N                                                                 |              | 1,246        | 9,287                 | 4,437        | 7,825                 |
| <i>Physician visits, days</i>                                     | Mean (SD)    | 14.9 (8.3)   | 16.6 (8.8)            | 16.7 (8.9)   | 16.9 (8.8)            |
|                                                                   | Median (IQR) | 13.5 (10–19) | 15 (11–21)            | 15 (11–22)   | 15 (11–22)            |
| <i>Length of hospital stay, days</i><br>- Users only <sup>a</sup> | Mean (SD)    | 8.6 (46.3)   | 4.0 (24.6)            | 6.9 (41.3)   | 4.0 (27.7)            |
|                                                                   | N (%)        | 181 (15)     | 1,352 (15)            | 514 (12)     | 876 (11)              |
|                                                                   | Mean (SD)    | 59.1 (108.8) | 27.6 (59.3)           | 59.8 (107.6) | 35.7 (75.6)           |
|                                                                   | Median (IQR) | 12 (3–36)    | 9 (3–23)              | 13.5 (4–41)  | 10 (4–26.5)           |
| <b>Participants with LTC needs certification</b>                  |              |              |                       |              |                       |
| N                                                                 |              | 458          | 1,861                 | 3,046        | 2,712                 |
| <i>Physician visits, days</i>                                     | Mean (SD)    | 11.9 (9.7)   | 14.1 (9.8)            | 12.0 (9.9)   | 13.8 (10.0)           |
|                                                                   | Median (IQR) | 11.5 (4–17)  | 13 (7–20)             | 11 (3–18)    | 13 (6–19)             |
| <i>Length of hospital stay, days</i><br>- Users only <sup>a</sup> | Mean (SD)    | 27.2 (78.0)  | 23.7 (68.5)           | 18.4 (61.5)  | 18.9 (64.4)           |
|                                                                   | N (%)        | 147 (32)     | 611 (33)              | 797 (26)     | 641 (24)              |
|                                                                   | Mean (SD)    | 84.8 (118.9) | 72.0 (104.1)          | 70.3 (104.1) | 80.1 (112.5)          |
|                                                                   | Median (IQR) | 29 (11–100)  | 28 (11–74)            | 27 (11–70)   | 28 (11–91)            |

IQR, interquartile range; LTC, long-term care; SD, standard deviation.

<sup>a</sup> Participants who had at least one claim submitted for inpatient services, *excluding* some surgical procedures with episode-based bundled payment, during the 12-month study period.

**eTable 5.** Annual medical and long-term care expenditures (in JPY 1,000) by gender and household income category

| Types of services                                                          |              | Men             |                       | Women           |                       |
|----------------------------------------------------------------------------|--------------|-----------------|-----------------------|-----------------|-----------------------|
|                                                                            |              | Low income      | Middle-to-high income | Low income      | Middle-to-high income |
| <b>Participants without LTC needs certification</b>                        |              |                 |                       |                 |                       |
| N                                                                          |              | 1,246           | 9,287                 | 4,437           | 7,825                 |
| <b>Total: Medical and LTC services</b>                                     | Mean (SD)    | 729 (1,319)     | 645 (1,032)           | 605 (1,006)     | 534 (830)             |
|                                                                            | Median (IQR) | 321 (179–632)   | 334 (191–632)         | 307 (188–537)   | 306 (183–529)         |
| <b>Subtotal: Medical services</b>                                          | Mean (SD)    | 698 (1,251)     | 631 (1,006)           | 555 (914)       | 510 (782)             |
|                                                                            | Median (IQR) | 318 (178–620)   | 332 (190–619)         | 300 (183–515)   | 303 (181–516)         |
| <b>Inpatient services<br/>- Users only<sup>a</sup></b>                     | Mean (SD)    | 313 (1,098)     | 245 (861)             | 227 (866)       | 171 (692)             |
|                                                                            | N (%)        | 280 (22)        | 2,099 (23)            | 752 (17)        | 1,269 (16)            |
|                                                                            | Mean (SD)    | 1,394 (1,967)   | 1,082 (1,542)         | 1,342 (1,714)   | 1,053 (1,423)         |
|                                                                            | Median (IQR) | 566 (226–1,725) | 463 (194–1,334)       | 585 (225–1,745) | 492 (235–1,206)       |
| <b>Outpatient services</b>                                                 | Mean (SD)    | 245 (429)       | 249 (410)             | 192 (217)       | 209 (298)             |
|                                                                            | Median (IQR) | 141 (78–267)    | 159 (89–284)          | 141 (79–245)    | 152 (85–253)          |
| <b>Pharmaceuticals and<br/>pharmacy services by<br/>community pharmacy</b> | Mean (SD)    | 139 (203)       | 137 (171)             | 135 (152)       | 130 (139)             |
|                                                                            | Median (IQR) | 100 (20–206)    | 101 (23–200)          | 106 (30–196)    | 98 (22–194)           |

|                                                                            |  |              |                     |                   |                     |                   |
|----------------------------------------------------------------------------|--|--------------|---------------------|-------------------|---------------------|-------------------|
| <b>Subtotal: LTC services</b>                                              |  | Mean (SD)    | 32 (219)            | 15 (143)          | 50 (327)            | 24 (187)          |
| <b>Participants with LTC needs certification</b>                           |  |              |                     |                   |                     |                   |
| <b>N</b>                                                                   |  |              | 458                 | 1,861             | 3,046               | 2,712             |
| <b>Total: Medical and LTC services</b>                                     |  | Mean (SD)    | 2,629 (1,891)       | 2,537 (2,003)     | 2,700 (1,753)       | 2,351 (1,816)     |
|                                                                            |  | Median (IQR) | 2,295 (1,043–3,842) | 2,041 (937–3,748) | 2,803 (1,068–3,902) | 1,894 (861–3,600) |
| <b>Subtotal: Medical services</b>                                          |  | Mean (SD)    | 1,173 (1,590)       | 1,273 (1,743)     | 956 (1,367)         | 1,000 (1,472)     |
|                                                                            |  | Median (IQR) | 579 (249–1,338)     | 641 (319–1,395)   | 486 (238–1,020)     | 487 (239–978)     |
| <b>Inpatient services<br/>- Users only<sup>a</sup></b>                     |  | Mean (SD)    | 719 (1,555)         | 738 (1,665)       | 532 (1,313)         | 557 (1,437)       |
|                                                                            |  | N (%)        | 185 (40)            | 752 (40)          | 997 (33)            | 821 (30)          |
|                                                                            |  | Mean (SD)    | 1,780 (2,026)       | 1,826 (2,208)     | 1,626 (1,868)       | 1,841 (2,113)     |
|                                                                            |  | Median (IQR) | 911 (428–2,500)     | 922 (390–2,395)   | 904 (393–2,062)     | 958 (408–2,439)   |
| <b>Outpatient services</b>                                                 |  | Mean (SD)    | 281 (503)           | 347 (584)         | 250 (435)           | 269 (440)         |
|                                                                            |  | Median (IQR) | 141 (46–371)        | 180 (74–410)      | 132 (51–307)        | 158 (66–331)      |
| <b>Pharmaceuticals and<br/>pharmacy services by<br/>community pharmacy</b> |  | Mean (SD)    | 173 (189)           | 187 (214)         | 173 (170)           | 173 (179)         |
|                                                                            |  | Median (IQR) | 136 (6–273)         | 151 (25–275)      | 143 (37–260)        | 134 (19–262)      |
| <b>Subtotal: LTC services</b>                                              |  | Mean (SD)    | 1,455 (1,316)       | 1,264 (1,203)     | 1,745 (1,392)       | 1,351 (1,271)     |
|                                                                            |  | Median (IQR) | 1,042 (272–2,645)   | 873 (220–2,185)   | 1,522 (382–3,151)   | 948 (224–2,364)   |
| <b>Institutional care</b>                                                  |  | Mean (SD)    | 723 (1,331)         | 507 (1,121)       | 1,107 (1,528)       | 606 (1,235)       |

|                                                      |              |                     |                     |                     |                     |
|------------------------------------------------------|--------------|---------------------|---------------------|---------------------|---------------------|
| - <i>Users only</i> <sup>a</sup>                     | N (%)        | 116 (25)            | 386 (21)            | 1,142 (37)          | 618 (23)            |
|                                                      | Mean (SD)    | 2,854 (953)         | 2,446 (1,145)       | 2,954 (879)         | 2,657 (1,112)       |
|                                                      | Median (IQR) | 3,151 (2,581–3,435) | 2,793 (1,662–3,338) | 3,199 (2,664–3,522) | 3,045 (1,972–3,490) |
| <b>Home care</b><br>- <i>Users only</i> <sup>a</sup> | Mean (SD)    | 732 (951)           | 757 (899)           | 637 (923)           | 746 (913)           |
|                                                      | N (%)        | 300 (66)            | 1,391 (75)          | 1,985 (65)          | 2,029 (75)          |
|                                                      | Mean (SD)    | 1,118 (975)         | 1,012 (907)         | 978 (987)           | 997 (930)           |
|                                                      | Median (IQR) | 857 (361–1,580)     | 728 (301–1,489)     | 632 (238–1,398)     | 689 (264–1,507)     |

IQR, interquartile range; LTC, long-term care; SD, standard deviation.

<sup>a</sup> Participants who had at least one claim submitted for inpatient services, *including* some surgical procedures with episode-based bundled payment, institutional care, or home care services, respectively, during the 12-month study period.
